# Supplementary material
Source: Springer Nature journal article supplement (https://www.springermedizin.de/resource/supplementary/12885_2011_2865_MOESM1_ESM.pdf/9462140)

中国地区分布图  
Map of China

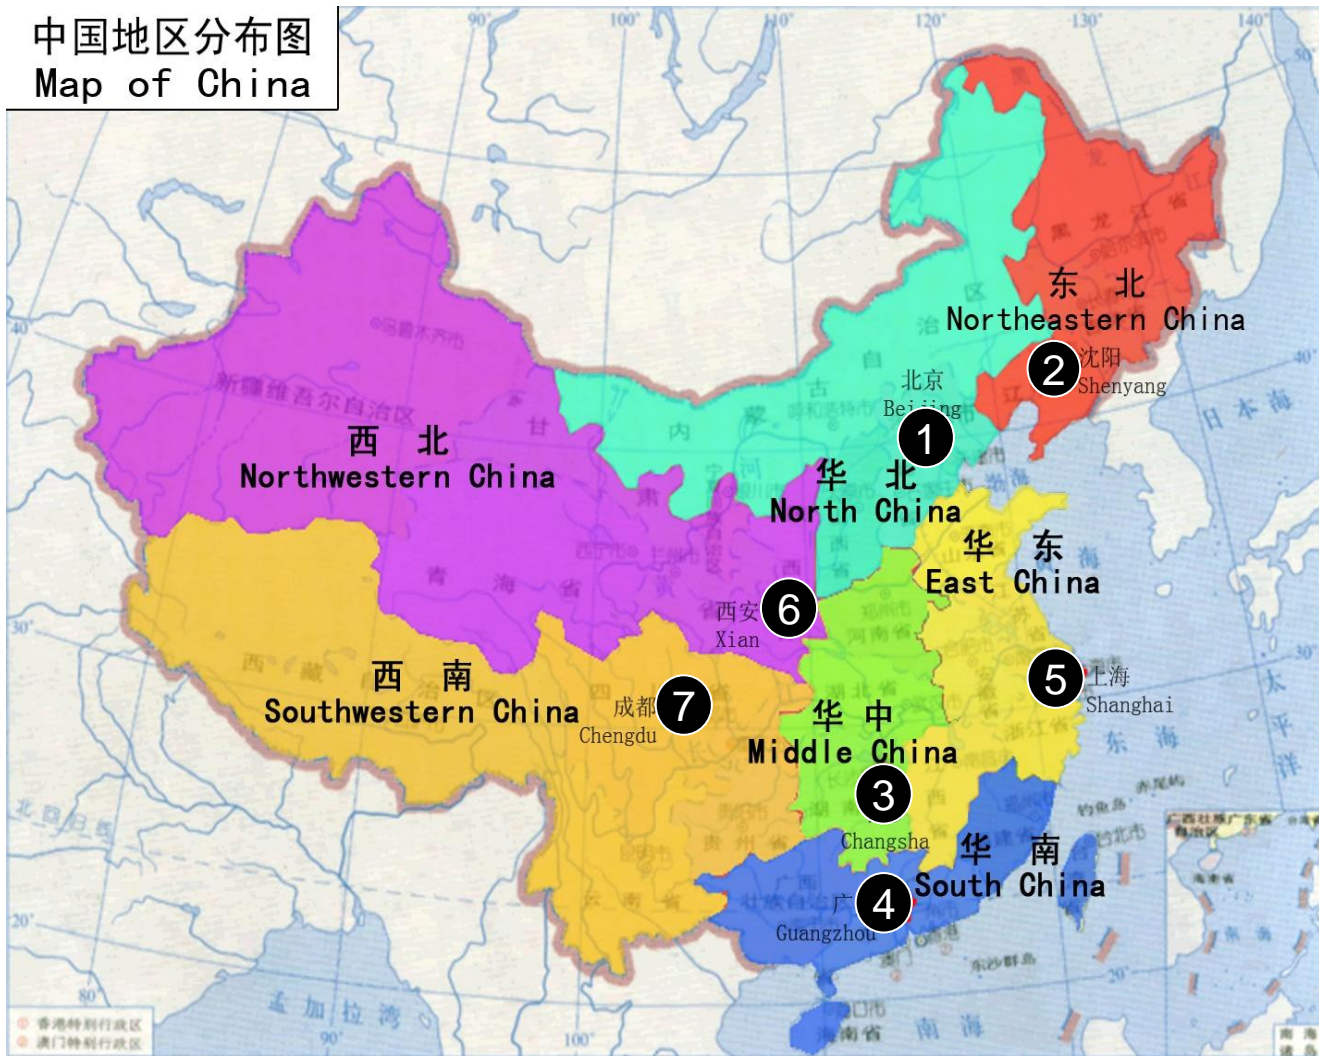

Supplement: MOESM1 [file 9462140]
